# Supplementary material for: The reference genome of Macropodus opercularis (the paradise fish)
Source: PubMed Central journal article supplement (PMC11127978; doi:10.1038/s41597-024-03277-1), 2024-05-25
Supplement: 41597_2024_3277_MOESM1_ESM.pdf [file 41597_2024_3277_MOESM1_ESM.pdf]

Table S1: Summary of the paradise fish genome assembly statistics. GC (Guanine and cytosine percentage)

|                         | macOpe2   |
|-------------------------|-----------|
| Number of contigs       | 162       |
| Assembled genome length | 411228032 |
| GC (%)                  | 43.93     |
| N50                     | 19217602  |
| N90                     | 12148816  |
| L50                     | 12        |
| L90                     | 24        |

Table S2: Summary of the repeats annotation using repeatsmasker.

| Repeat class           | Repeat family  | Sub-family    | Number of elements | Total length (bp) | Percentage in the genome (%) |
|------------------------|----------------|---------------|--------------------|-------------------|------------------------------|
| <i>Retroelements</i>   |                |               | 116391             | 32955420          | 6.78                         |
|                        | SINEs:         |               | 6273               | 1017016           | 0.21                         |
|                        |                | Penelope      | 9438               | 2715604           | 0.56                         |
|                        | LINEs:         |               | 61426              | 16447763          | 3.38                         |
|                        |                | L2/CR1/Rex    | 38220              | 10460451          | 2.15                         |
|                        |                | R1/LOA/Jockey | 1434               | 233297            | 0.05                         |
|                        |                | R2/R4/NeSL    | 2154               | 544878            | 0.11                         |
|                        |                | RTE/Bov-B     | 7389               | 1528880           | 0.31                         |
|                        |                | L1/CIN4       | 2176               | 736663            | 0.15                         |
|                        | LTR:           |               | 48692              | 15490642          | 3.19                         |
|                        |                | BEL/Pao       | 4151               | 841670            | 0.17                         |
|                        |                | Ty1/Copia     | 468                | 174882            | 0.04                         |
|                        |                | Gypsy/DIRS1   | 10226              | 4243390           | 0.87                         |
|                        |                | Retroviral    | 23537              | 8392820           | 1.73                         |
| <i>DNA transposons</i> |                |               | 52062              | 11076209          | 2.28                         |
|                        | hobo/activator |               | 15182              | 4804346           | 0.99                         |
|                        | Tc1-IS630-Pogo |               | 17345              | 3178319           | 0.65                         |
|                        | PiggyBac       |               | 12813              | 18397776          | 0.38                         |
| <i>Rolling-circles</i> |                |               | 7115               | 1119332           | 0.23                         |
| <i>Unclassified</i>    |                |               | 15006              | 2073092           | 0.43                         |
| <i>Satellites</i>      |                |               | 8885               | 1707277           | 0.35                         |

Table S3: Summary of the contigs containing telomeric sequences

| contig name | telomere start | telomere end | Chromosome ID |
|-------------|----------------|--------------|---------------|
| ptg000001l  | 0              | 7800         |               |
| ptg000002l  | 1400           | 5600         |               |
| ptg000004l  | 0              | 6400         | Chr3          |
| ptg000004l  | 20357400       | 20365586     | Chr3          |
| ptg000006l  | 19384400       | 19393576     |               |
| ptg000007l  | 600            | 5400         |               |
| ptg000008l  | 0              | 7800         |               |
| ptg000009l  | 24015400       | 24022457     |               |
| ptg000010l  | 0              | 9000         | Chr9          |
| ptg000010l  | 22105000       | 22111710     | Chr9          |
| ptg000011l  | 21562200       | 21566751     |               |
| ptg000012l  | 0              | 6000         |               |
| ptg000015l  | 0              | 1000         |               |
| ptg000015l  | 2000           | 5400         |               |
| ptg000016l  | 0              | 3000         |               |
| ptg000017l  | 0              | 3800         |               |
| ptg000018l  | 0              | 7800         |               |
| ptg000019l  | 0              | 1000         |               |
| ptg000020l  | 1600           | 8000         |               |
| ptg000024l  | 0              | 7400         | Chr21         |
| ptg000024l  | 20760800       | 20766222     | Chr21         |
| ptg000025l  | 0              | 1800         |               |
| ptg000025l  | 2200           | 7400         |               |
| ptg000026l  | 0              | 5200         | Chr17         |
| ptg000026l  | 17471800       | 17478600     | Chr17         |
| ptg000028l  | 0              | 6800         | Chr8          |
| ptg000028l  | 17089800       | 17096669     | Chr8          |
| ptg000030l  | 0              | 5600         | Chr15         |
| ptg000030l  | 17874200       | 17880400     | Chr15         |
| ptg000054l  | 31000          | 38154        |               |
| ptg000083l  | 0              | 6800         |               |
| ptg000100l  | 0              | 7200         |               |
| ptg000112l  | 0              | 7600         |               |
| ptg000120l  | 24400          | 26339        |               |

Contigs marked in yellow appear to be fully sequenced telomere-to-telomere

| Software    | Version | URL                                                                                                                                           | parameters                                                                                                                                                                                                             | comment                                                                                                                                                                                                                                                              |
|-------------|---------|-----------------------------------------------------------------------------------------------------------------------------------------------|------------------------------------------------------------------------------------------------------------------------------------------------------------------------------------------------------------------------|----------------------------------------------------------------------------------------------------------------------------------------------------------------------------------------------------------------------------------------------------------------------|
| Trim Galore | 0.6.5   | <a href="https://www.bioinformatics.babraham.ac.uk/projects/trim_galore/">https://www.bioinformatics.babraham.ac.uk/projects/trim_galore/</a> | for fastq in *.fastq.gz ; do trim_galore --quality 25 --fastqc --length 25 --output_dir qc_results \$fastq ; cd qc_results ; multiqc . ; Done                                                                          | This line of code was used to trim the adapter sequences from the fastq and to drop the reads having quality value of less than 25. The multiqc was then run in the "qc_results" directory to consolidate the quality control results for ease of interpretation.    |
| Hifiasm     | 0.19.3  | <a href="https://github.com/chhy123/hifiasm">https://github.com/chhy123/hifiasm</a>                                                           | hifiasm -o MacOpe2.asm -t 32 -l 0 hifi_data/*.fastq.gz                                                                                                                                                                 | The hifiasm was run using default parameters. The number of threads used was 32 ( -t 32) and the purging level was set to 0 (-l 0).                                                                                                                                  |
| BRAKER      | 3.0.2   | <a href="https://github.com/Gaius-Augustus/BRAKER">https://github.com/Gaius-Augustus/BRAKER</a>                                               | braker.pl --cores=\$THREADS --verbosity=3 --makehub --species=\$SPECIES_NAME -gff3 --genome=\$GENOME --bam=\$TRANSCRIPT_BAM --BAMTOOLS_PATH=/data/okendojo/conda/envs/BRAKER/bin/ --softmasking --useexisting --UTR=on | SPECIES_NAME="paradisefish" is the species name to be used when building the Augustus gene model. In --genome=\$GENOME is the soft masked reference genome sequence to be analysed ; and --bam=\$TRANSCRIPT_BAM is the list of bam files to be used in the analysis. |

|               |         |                                                                                                       |                                                                                                                                                                                                                                 |                                                                                                                                                                                                                                                                                                                                                                                                                                                                                                                                                                                                                                                |
|---------------|---------|-------------------------------------------------------------------------------------------------------|---------------------------------------------------------------------------------------------------------------------------------------------------------------------------------------------------------------------------------|------------------------------------------------------------------------------------------------------------------------------------------------------------------------------------------------------------------------------------------------------------------------------------------------------------------------------------------------------------------------------------------------------------------------------------------------------------------------------------------------------------------------------------------------------------------------------------------------------------------------------------------------|
| MAKER         | 3.01.04 | <a href="https://github.com/Yandell-Lab/maker">https://github.com/Yandell-Lab/maker</a>               | Running MAKER round one: mpiexec -n 32 maker -base maker_001 maker1_opts.ctl maker_bopts.ctl maker_exe.ctl -f ; Running maker round two: mpiexec -n 32 maker -base maker2_blat maker2_opts.ctl maker_bopts.ctl maker_exe.ctl -f | Running MAKER round one ; we specified the MacOpe2.fasta as our genome of interest , the transcriptome assembly from Trinity was specified as esxpressed sequence tag (EST). The zebrafish/vertbrates proteomes was used to do the protein homology evidence analysis. "model organism" was set to simple and the custom repeat librabry generated by RepeatModeler. The genomic repeats was softmasked during the first round of MAKER analysis. The second round of MAKER run, the gff file from the first MAKER run was used in the re-annotation. The GeneMark file from the BRAKER run and the augustus was used to run gene predictions. |
| RepeatModeler | 5.8.8   | <a href="https://www.repeatmasker.org/RepeatModeler/">https://www.repeatmasker.org/RepeatModeler/</a> | BuildDatabase -name paradisefish -engine ncbi MacOpe2.fasta ; RepeatModeler -pa                                                                                                                                                 | The first run is used to build a new                                                                                                                                                                                                                                                                                                                                                                                                                                                                                                                                                                                                           |

|              |       |                                                                                                                                 |                                                                                                                                                                                                              |                                                                                                                                                                                                                    |
|--------------|-------|---------------------------------------------------------------------------------------------------------------------------------|--------------------------------------------------------------------------------------------------------------------------------------------------------------------------------------------------------------|--------------------------------------------------------------------------------------------------------------------------------------------------------------------------------------------------------------------|
|              |       |                                                                                                                                 | 32 -engine ncbi -database paradisefish 2>&1   tee 00_repeatmodeler.log                                                                                                                                       | RepeatModeler<br>BLAST database and the second run does the RepeatModeller analysis of the MacOpe2 genome                                                                                                          |
| RepeatMasker | 4.1.5 | <a href="https://www.repeatmasker.org/">https://www.repeatmasker.org/</a>                                                       | RepeatMasker -pa 32 -species paradisefish -e ncbi -dir macOpe2_mask MacOpe2.fasta                                                                                                                            |                                                                                                                                                                                                                    |
| GenomeScope  | 1.0.o | <a href="https://github.com/schatzlab/genomescope">https://github.com/schatzlab/genomescope</a>                                 | Rscript genomescope.R MacOpe2.histo 21 150 output_dir                                                                                                                                                        | 21 is the k-mer length and 150 is the maximum read length.                                                                                                                                                         |
| Jellyfish    | 2.3.0 | <a href="https://github.com/gmarcais/Jellyfish">https://github.com/gmarcais/Jellyfish</a>                                       | jellyfish count -C -m 21 -s 2000M -t 32 <(zcat L001_R1_001.fastq.gz L001_R2_001.fastq.gz) <(zcat L004_R1_001.fastq.gz L004_R2_001.fastq.gz) -o MacOpe2.jf ; jellyfish histo -t 32 MacOpe2.jf > MacOpe2.histo | Jellyfish was used to count kmers. The second part of the jellyfish run was used to export the k-mer count histogram. The length of mer was set 21 (-m 21) and the initial harsh size was set at 2000M (-s 2000M). |
| Trinity      | 2.0.2 | <a href="https://github.com/trinityrnaseq/trinityrnaseq.github.io">https://github.com/trinityrnaseq/trinityrnaseq.github.io</a> | Trinity --seqType fq --max_memory 180G - -samples_file sample.txt --trimmomatic --monitoring --monitor_sec 30 --CPU 32 --output MacOpe2_trinityasm                                                           | "sample.txt" contains the fullpaths of fastq files to be used in the assembly.                                                                                                                                     |
| BUSCO        | 5.4.6 | <a href="https://busco.ezlab.org/">https://busco.ezlab.org/</a>                                                                 | busco -i assembly.fasta -o MacOpe2 -m genome --long --augustus_parameters='--progress=true' --augustus_species paradise_fish --auto-lineage-euk -f --cpu 32 --augustus --out_path results                    |                                                                                                                                                                                                                    |
| QUAST        | 5.2.0 | <a href="https://github.com/ablab/quast">https://github.com/ablab/quast</a>                                                     | quast.py -o \${outdir} -l 'MacOpe2_hifiasm, verkko_asm, Haplotype1, Haplotype2' -t 32 --eukaryote --est-ref-size 411228032 --plots-format png MacOpe2.fasta                                                  |                                                                                                                                                                                                                    |

|                                 |         |                                                                                                 |                                                                                                                                                                                                                                                                                                                                                                                                                                                                                                                                                                                                                                                                                                                                                                                                                                                                                                                                                                                                                                                                                                                                                                    |                                                         |
|---------------------------------|---------|-------------------------------------------------------------------------------------------------|--------------------------------------------------------------------------------------------------------------------------------------------------------------------------------------------------------------------------------------------------------------------------------------------------------------------------------------------------------------------------------------------------------------------------------------------------------------------------------------------------------------------------------------------------------------------------------------------------------------------------------------------------------------------------------------------------------------------------------------------------------------------------------------------------------------------------------------------------------------------------------------------------------------------------------------------------------------------------------------------------------------------------------------------------------------------------------------------------------------------------------------------------------------------|---------------------------------------------------------|
|                                 |         |                                                                                                 | verrko_assembly.fasta hap1.fasta<br>hap2.fasta                                                                                                                                                                                                                                                                                                                                                                                                                                                                                                                                                                                                                                                                                                                                                                                                                                                                                                                                                                                                                                                                                                                     |                                                         |
| rnaQUAST                        | 2.2.3   | <a href="https://github.com/ablab/rnaquast">https://github.com/ablab/rnaquast</a>               | python rnaQUAST.py --transcripts<br>trinity.fasta --reference MacOpe2.fasta --gff<br>MAKER.gff                                                                                                                                                                                                                                                                                                                                                                                                                                                                                                                                                                                                                                                                                                                                                                                                                                                                                                                                                                                                                                                                     |                                                         |
| K-mer analysis<br>toolkit (KAT) | 2.4.1   | <a href="https://github.com/TGAC/KAT">https://github.com/TGAC/KAT</a>                           | kat comp -t 16 -o pe_vs_assembly<br>'ERR3332352_?.fastq.gz' MacOpe2.fasta                                                                                                                                                                                                                                                                                                                                                                                                                                                                                                                                                                                                                                                                                                                                                                                                                                                                                                                                                                                                                                                                                          |                                                         |
| GATK4                           | 4.4.0.0 | <a href="https://github.com/broadinstitute/gatk">https://github.com/broadinstitute/gatk</a>     | Reads mapping to assembled genome:<br>dragen-os -r dragenRef -1<br>ERR3332352_1.fastq.gz -2<br>ERR3332352_2.fastq.gz > macOpe2.sam ;<br>Get str table: gatk ComposeSTRTableFile -<br>R MacOpe2.fasta -O str_table.tsv ; Convert<br>sam to bam then sort and index: samtools<br>view -S -b macOpe2.sam -o macOpe2.bam<br>; samtools sort macOpe2.bam -o<br>macOpe2.sorted.bam ; samtools index<br>macOpe2.sorted.bam ; Add readgroups :<br>java -jar \$PICARDJARPATh/picard.jar<br>AddOrReplaceReadGroups -I<br>macOpe2.bam -O macOpe2_RG.bam -<br>RGID 4 -RGLB lib1 -RGPL ILLUMINA -<br>RGPU unit1 -RGSM 20 -SO coordinate --<br>CREATE_INDEX true ; Calibrate model:<br>gatk CalibrateDragstrModel -R<br>MacOpe2.fasta -I macOpe2.sorted.bam -<br>str str_table.tsv -O dragstr_model.txt ; Call<br>variants : gatk HaplotypeCaller -R<br>macOpe2.fasta -I macOpe2.sorted.bam<br>-O sv_output_file.vcf --dragen-mode true -<br>-add-output-vcf-command-line false --<br>dragstr-params-path dragstr_model.txt ;<br>gatk VariantFiltration -V output_file.vcf --<br>filter-expression "QUAL < 10.4139" --filter-<br>name "DRAGENHardQUAL" -O<br>output_filtered.vcf |                                                         |
| OrthoFinder                     | 2.5.5   | <a href="https://github.com/davidemms/OrthoFinder">https://github.com/davidemms/OrthoFinder</a> | OrthoFinder -f MacOpe2_results ; The<br>visualization of the data was then done in R                                                                                                                                                                                                                                                                                                                                                                                                                                                                                                                                                                                                                                                                                                                                                                                                                                                                                                                                                                                                                                                                               | "MacOpe2_results"<br>contains protein<br>sequences from |

|  |  |  |  |                                             |
|--|--|--|--|---------------------------------------------|
|  |  |  |  | MacOpe2 MAKER<br>run, medaka,<br>zebrafish. |
|--|--|--|--|---------------------------------------------|
